# Supplementary material for: The synthesis of monodispersed M-CeO2/SiO2nanoparticles and formation of UV absorption coatings with them
Source: Royal Society of Chemistry journal article supplement (doi:10.1039/c9ra08975f), 2020-01-01
Supplement: c9ra08975f1.pdf [file c9ra08975f1.pdf]

**Synthesis of monodispersed M-CeO<sub>2</sub>/SiO<sub>2</sub> nanoparticles and formation of  
hydrophobic UV absorption coating therefrom**

*Su Xunwen<sup>a</sup>, Zhu Liqun<sup>a</sup>, Li Weiping<sup>a</sup>, Liu Huicong<sup>\*a</sup>, Ye Hui<sup>b</sup>*

Key Laboratory of Aerospace Materials and Performance (Ministry of Education),  
School of Materials Science and Engineering, Beihang University, Beijing 100191,  
China

\*E-mail address: [liuhc@buaa.edu.cn](mailto:liuhc@buaa.edu.cn)

Tel: +86 1082317113. Fax: +86 1082317113.

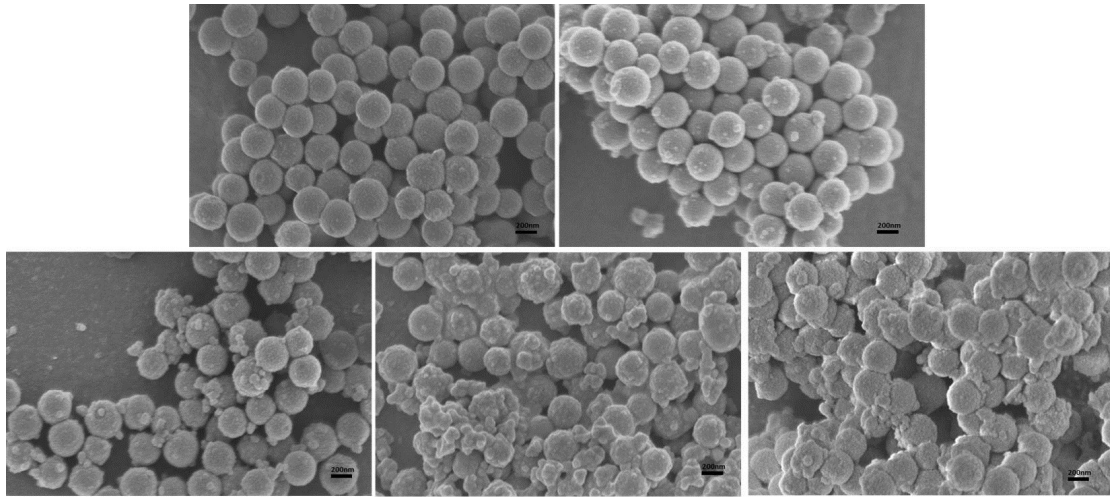

**Fig. S1.** SEM of  $\text{CeO}_2@\text{SiO}_2$  nanoparticles with different  $m(\text{Ce}(\text{NO}_3)_3 \cdot 6\text{H}_2\text{O})/m(\text{SiO}_2)$  ratio, (a) 1.5:1; (b) 2:1; (c) 2.5:1; (d) 3:1; (d) 4:1.

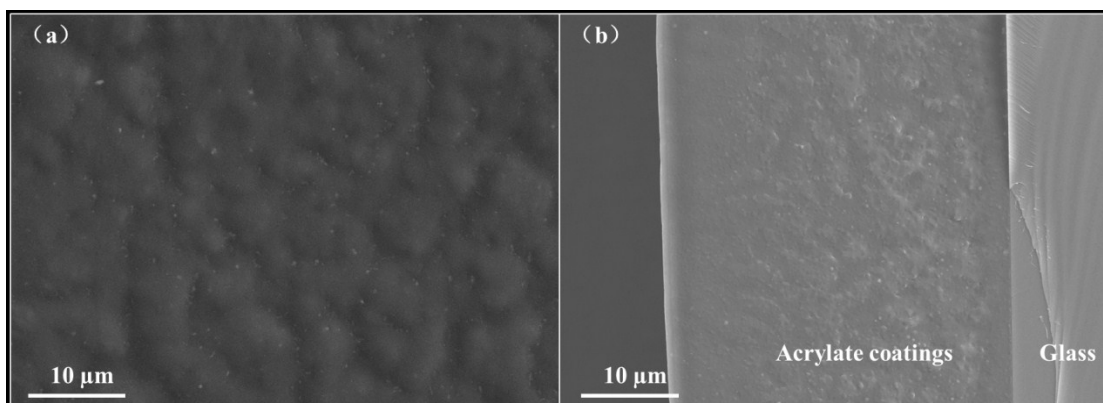

**Fig. S2** (a) SEM image of PFA10, (b) a section view of PFA10. A large number of white nanoparticles can be seen uniformly distributed in the coating

**Table S1** Elemental content of  $\text{M-CeO}_2@\text{SiO}_2$  by EDS (atomic percentage)

| Element | Area 1 | Area 2 | Area 3 |
|---------|--------|--------|--------|
| Si      | 38.37  | 38.18  | 38.39  |
| Ce      | 29.27  | 29.76  | 29.05  |
| O       | 32.36  | 32.06  | 32.56  |

Table S1 shows the EDS of M-CeO<sub>2</sub>@SiO<sub>2</sub>, in which three measurements were made to ensure the accuracy of results. As shown in table S1, the average of atomic ratio of Si : Ce in M-CeO<sub>2</sub>@SiO<sub>2</sub> is about 4.391. That means the mass fraction of CeO<sub>2</sub> in M-CeO<sub>2</sub>@SiO<sub>2</sub> is approximately 39.5% according the formula below:

$$W(CeO_2) = \frac{M(CeO_2) \times 1}{M(CeO_2) \times 1 + M(SiO_2) \times 4.391}$$
